# Supplementary material for: High-valent manganese(v)–oxo porphyrin complexes in hydride transfer reactions
Source: Royal Society of Chemistry journal article supplement (doi:10.1039/b814928c), 2008-12-19
Supplement: b814928c.pdf [file b814928c.pdf]

## Supporting Information

### High-Valent Manganese(V)-Oxo Porphyrin Complexes in Hydride Transfer Reactions

Jung Yoon Lee,<sup>a</sup> Yong-Min Lee,<sup>a</sup> Hiroaki Kotani,<sup>b</sup> Wonwoo Nam<sup>\*a</sup> and Shunichi Fukuzumi<sup>\*b</sup>

<sup>a</sup>*Department of Chemistry and Nano Science, Centre for Biomimetic Systems, Ewha Womans University,  
Seoul 120-750, Korea*

<sup>b</sup>*Department of Material and Life Science, Graduate School of Engineering, Osaka University, SORST,  
Japan Science and Technology Agency (JST), Suita, Osaka 565-0871, Japan*

E-mail: fukuzumi@chem.eng.osaka-u.ac.jp, wwnam@ewha.ac.kr

## Experimental Section

**Materials.** Commercially available reagents, such as Mn(Prop)Cl (Prop = TPFPP, TDFPP and TDCPP; Frontier Scientific Inc., Logan, UT, USA), 1-benzyl-1,4-dihydronicotinamide (BNAH), 9-phenyl-10-methylacridinium ion ( $\text{Acr}^+\text{-Ph}$ ), 10-methylacridone, acridine, methyl iodide (MeI),  $\text{NaBH}_4$ ,  $\text{LiAlD}_4$  and  $\text{NaBD}_4$ , were the best available purity and were used without further purification unless otherwise noted. Acetonitrile (MeCN), dichloromethane, and ether were dried according to the literature procedures<sup>1</sup> and distilled under Ar prior to use. *m*-Chloroperbenzoic acid (*m*-CPBA) was purified by washing with phosphate buffer (pH 7.4) followed by water and then dried under reduced pressure.

9,10-Dihydro-10-methylacridine ( $\text{AcrH}_2$ ) was prepared by reducing 10-methylacridinium iodide ( $\text{AcrH}^+\text{I}^-$ ) with  $\text{NaBH}_4$  in methanol and purified by recrystallization from ethanol.<sup>2</sup> For the preparation of  $\text{AcrH}^+\text{I}^-$ , acridine was treated with MeI in acetone, and then the mixture was refluxed for 7 days. 9-Alkyl-9,10-dihydro-10-methylacridine ( $\text{AcrHR}$ ; R = Me, Et) was prepared by the reduction of  $\text{AcrH}^+\text{I}^-$  with the corresponding Grignard reagents ( $\text{RMgX}$ ) and purified by recrystallization from ethanol.<sup>2</sup> The dideuterated compound, [9,9'- $^2\text{H}_2$ ]-10-methylacridine ( $\text{AcrD}_2$ ), was prepared from 10-methylacridone by reduction with  $\text{LiAlD}_4$  in ether.<sup>2</sup> The dideuterated compound, 1-benzyl-1,4-dihydro[4,4'- $^2\text{H}_2$ ]-nicotinamide ( $\text{BNAH-4,4'}\text{-}d_2$ ), was prepared from monodeuterated compound ( $\text{BNAH-4-}d_1$ ) by three cycles of oxidation with *p*-chloranil in dimethylformamide and reduction with dithionite in deuterium oxide.<sup>3,4</sup>

**Instrumentation.** UV-vis spectra were recorded on a Hewlett Packard 8453 spectrophotometer equipped with a circulating water bath or a Hi-Tech Scientific SF-61 multimixing cryogenic stopped-flow instrument equipped with a Hi-Tech Scientific KinetaScan diode array rapid scanning unit. Product analysis was performed with a Thermo Finnigan (Austin, Texas, USA) FOCUS DSQ (dual stage quadrupole) mass spectrometer interfaced with Finnigan FOCUS gas chromatograph (GC-MS).  $^1\text{H}$  NMR was also measured with a Bruker 9503DPX-250 (250 MHz) FT-NMR spectrometer for the product analysis.  $^1\text{H}$ -NMR measurements were carried out in  $\text{CDCl}_3$  at 25 °C. Detailed experimental conditions are described in footnote of Fig. S3.

**Kinetic and Reactivity Studies.** All reactions were followed by monitoring UV-vis spectral changes of reaction solutions with a Hewlett Packard 8453 spectrophotometer equipped with an Optostat<sup>DN</sup>

variable-temperature liquid nitrogen cryostat (Oxford instruments) or with a Hi-Tech Scientific SF-61 multimixing cryogenic stopped-flow instrument equipped with a Hi-Tech Scientific KinetaScan diode array rapid scanning unit at 25 °C. Manganese(V)-oxo porphyrin complexes,  $[\text{Mn}^{\text{V}}(\text{O})_2(\text{TPFPP})]^-$  (**1**),  $[\text{Mn}^{\text{V}}(\text{O})_2(\text{TDFPP})]^-$  (**2**), and  $[\text{Mn}^{\text{V}}(\text{O})_2(\text{TDCPP})]^-$  (**3**), were prepared by reacting manganese(III) porphyrin chlorides (0.2 mM) with 6 equiv of *m*-CPBA in the presence of tetra-*n*-butylammonium hydroxide (20 equiv) in a solvent mixture of  $\text{CH}_3\text{CN}$  and  $\text{CH}_2\text{Cl}_2$  (1:1) at 25 °C. Subsequently, appropriate amounts of substrates were added to the reaction solutions. After the completion of reactions, pseudo-first-order fitting of the kinetic data allowed us to determine  $k_{\text{obs}}$  values. Product analysis was performed with  $[\text{Mn}^{\text{V}}(\text{O})_2(\text{TPFPP})]^-$  (1 mM) and substrates (50 mM), by injecting the reaction solutions directly into GC-MS. Products were identified by comparing retention times and mass patterns to those of known authentic samples. For NMR measurement, pure product of the completed reaction of  $[\text{Mn}^{\text{V}}(\text{O})_2(\text{TPFPP})]^-$  and  $\text{AcrH}_2$  at 25 °C was obtained after column chromatography, which was packed with silicagel 60.

## References

- [1] W. L. F. Armarego and C. L. L. Chai, *Purification of Laboratory Chemicals*, 5th ed., Butterworth-Heiemann, Oxford, **2003**.
- [2] a) S. Fukuzumi, S. Koumitsu, K. Hironaka and T. Tanaka, *J. Am. Chem. Soc.*, 1987, **109**, 305; b) S. Fukuzumi, Y. Tokuda, T. Kitano, T. Okamoto and J. Otera, *J. Am. Chem. Soc.*, 1993, **115**, 8960.
- [3] a) A. G. Anderson, Jr. and G. Berkelhammer, *J. Am. Chem. Soc.*, 1958, **80**, 992; b) D. Mauzerall and F. H. Westheimer, *J. Am. Chem. Soc.*, 1955, **77**, 2261.
- [4] W. Caughey and K. A. Schellenberg, *J. Org. Chem.*, 1966, **31**, 1978.

**Table S1.** Second-Order Rate Constants,  $k_2$ , Determined in Hydride Transfer from NADH Analogues to  $[\text{Mn}^{\text{V}}(\text{O})_2(\text{Porp})]^-$  at 25 °C.

| Entry | NADH analogue     | $k_2 ([\text{Mn}^{\text{V}}(\text{O})_2(\text{Porp})]^-), \text{M}^{-1} \text{s}^{-1}$ |                      |                      | $k_2 (\text{Cl}_4\text{Q}),^a$<br>$\text{M}^{-1} \text{s}^{-1}$ | $k_d,^b \text{s}^{-1}$ |
|-------|-------------------|----------------------------------------------------------------------------------------|----------------------|----------------------|-----------------------------------------------------------------|------------------------|
|       |                   | Porp = TPFPP                                                                           | Porp = TDFPP         | Porp = TDCPP         |                                                                 |                        |
| 1     | BNAH              | $1.3 \times 10^3$                                                                      | $6.2 \times 10^2$    | $5.9 \times 10$      | $1.0 \times 10^3$                                               | $2.4 \times 10$        |
| 2     | BNAH-4,4'- $d_2$  | $1.3 \times 10^2$                                                                      | $7.7 \times 10$      | $1.0 \times 10$      | $1.9 \times 10^2$                                               | $1.8 \times 10$        |
| 3     | AcrH <sub>2</sub> | $1.5 \times 10$                                                                        | 3.9                  | 1.3                  | $1.5 \times 10$                                                 | 6.4                    |
| 4     | AcrD <sub>2</sub> | 1.0                                                                                    | $2.0 \times 10^{-1}$ | $1.3 \times 10^{-1}$ | 1.7                                                             | $7.1 \times 10^{-1}$   |
| 5     | AcrHMe            | $2.7 \times 10^{-1}$                                                                   | $1.1 \times 10^{-1}$ | $6.4 \times 10^{-2}$ | $9.4 \times 10^{-1}$                                            | 1.1                    |
| 6     | AcrHPh            | $1.7 \times 10^{-1}$                                                                   | $6.5 \times 10^{-2}$ | $5.6 \times 10^{-2}$ | $6.6 \times 10^{-1}$                                            | 4.1                    |
| 7     | AcrHEt            | $9.3 \times 10^{-2}$                                                                   | $5.1 \times 10^{-2}$ | $5.4 \times 10^{-2}$ | $4.6 \times 10^{-1}$                                            | $4.9 \times 10^{-1}$   |

<sup>a</sup> Detailed discussion on the linear correlation observed in hydride-transfer reactions by high-valent metal-oxo species and Cl<sub>4</sub>Q will be presented in elsewhere: S. Fukuzumi, H. Kotani, Y.-M. Lee, W. Nam, unpublished results. <sup>b</sup> Taken from reference 12 in the text.

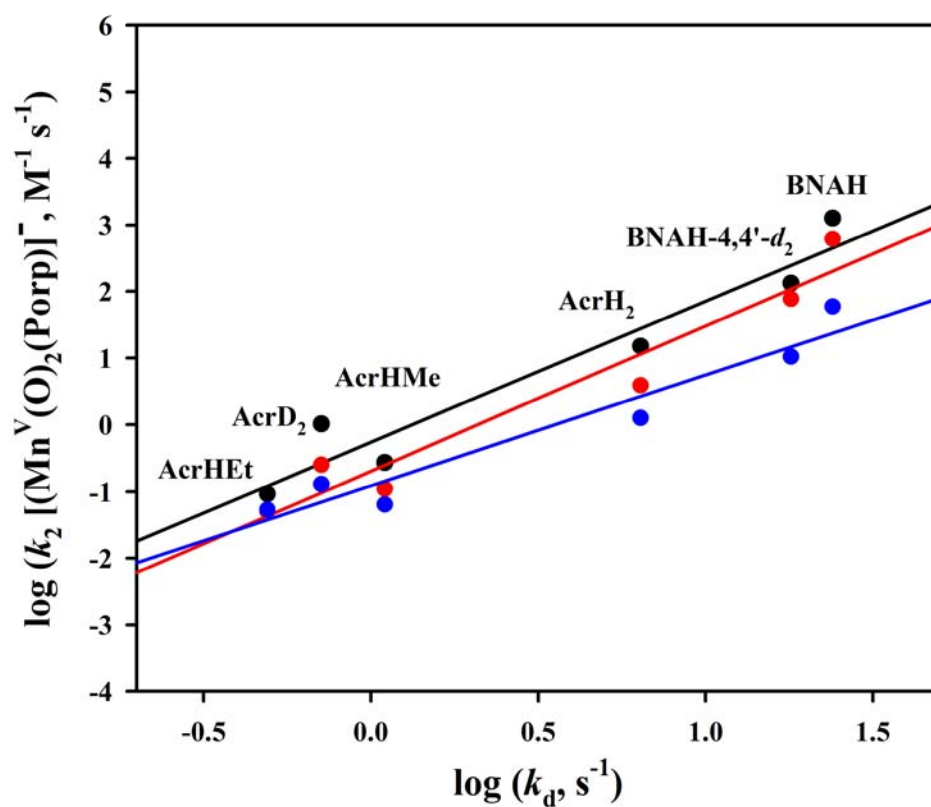

**Fig. S1** Plot of  $\log k_2$  for the reactions of NADH analogues with  $[Mn(V)(O)_2(TPFP)]^-$  (**1**) (black circles),  $[Mn(V)(O)_2(TDFPP)]^-$  (**2**) (red circles), and  $[Mn(V)(O)_2(TDCPP)]^-$  (**3**) (blue circles) vs  $\log k_d$  for the deprotonation of  $AcrHR^{++}$  in MeCN at 298 K.

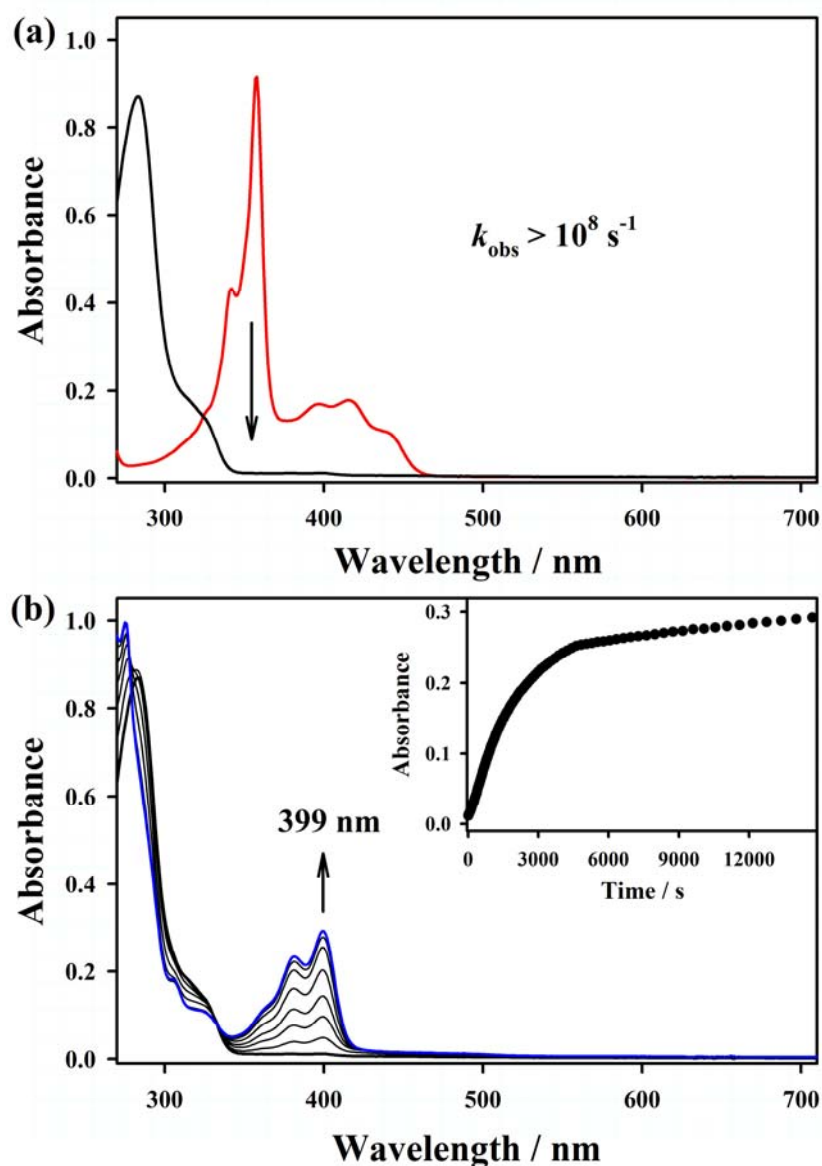

**Fig. S2** (a) UV-vis spectral change of 10-methylacridinium  $[AcrH^+]$  (0.05 mM) (red line) to 9-hydroxy-9,10-dihydro-10-methylacridine  $[AcrH(OH)]$  (black line) upon addition of 20 equiv tetra-*n*-butylammonium hydroxide to a solution of  $AcrH^+$  (0.05 mM) in a solvent mixture of  $CH_3CN$  and  $CH_2Cl_2$  (1:1) at 25 °C. The disappearance of  $AcrH^+$  was  $k_{obs} > 10^8 \text{ s}^{-1}$ . (b) UV-vis spectral changes showing the conversion of  $AcrH(OH)$  (0.05 mM; black line) to 10-methylacridone  $[Acr(O)]$  (blue line) in a solvent mixture of  $CH_3CN$  and  $CH_2Cl_2$  (1:1) at 25 °C. The  $AcrH(OH)$  species did not react with  $[Mn^V(O)_2(Porp)]^-$ , but were slowly converted to  $Acr(O)$  in air. Inset shows time course of the formation of  $Acr(O)$  monitored at 399 nm.

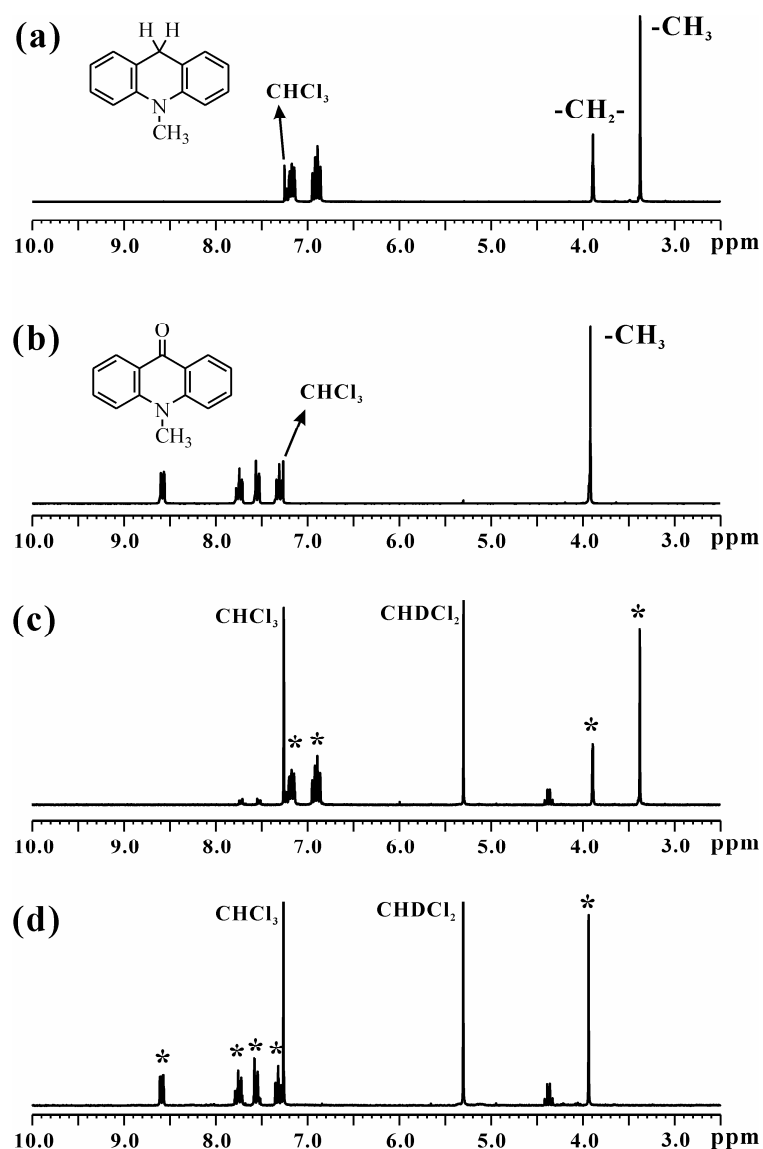

**Fig. S3**  $^1\text{H}$ -NMR spectra (250 MHz) of the authentic reference samples and the products obtained from the completed reaction of  $[\text{Mn}^{\text{V}}(\text{O})_2(\text{TPFPP})]^-$  and 10-methyl-9,10-dihydroacridine ( $\text{AcrH}_2$ ) in  $\text{CDCl}_3$  at 25  $^\circ\text{C}$ . (a) and (b) show  $^1\text{H}$ -NMR spectra of the authentic samples,  $\text{AcrH}_2$  and 10-methyl-acridone ( $\text{Acr}(\text{O})$ ), respectively. Pure product of the completed reaction of  $[\text{Mn}^{\text{V}}(\text{O})_2(\text{TPFPP})]^-$  and  $\text{AcrH}_2$  at 25  $^\circ\text{C}$  was obtained after column chromatography, which was packed with silicagel 60. (c) shows  $^1\text{H}$ -NMR spectrum of the unreacted  $\text{AcrH}_2$  obtained from the first fraction, which was eluted by 100%  $\text{CH}_2\text{Cl}_2$ . (d) shows  $^1\text{H}$ -NMR spectrum of the product obtained from the second fraction, which was eluted by 90%  $\text{CH}_2\text{Cl}_2$  and 10% acetone. This spectrum is completely matched with that of  $\text{Acr}(\text{O})$  authentic sample.
